# Supplementary material for: Ingredients for microbial life preserved in 3.5 billion-year-old fluid inclusions
Source: PubMed Central journal article supplement (PMC7889642; doi:10.1038/s41467-021-21323-z), 2021-02-17
Supplement: 41467_2021_21323_MOESM1_ESM.pdf [file 41467_2021_21323_MOESM1_ESM.pdf]

## **Supplementary information**

# Ingredients for microbial life preserved in 3.5 billion-year-old fluid inclusions

Helge Mißbach et al.

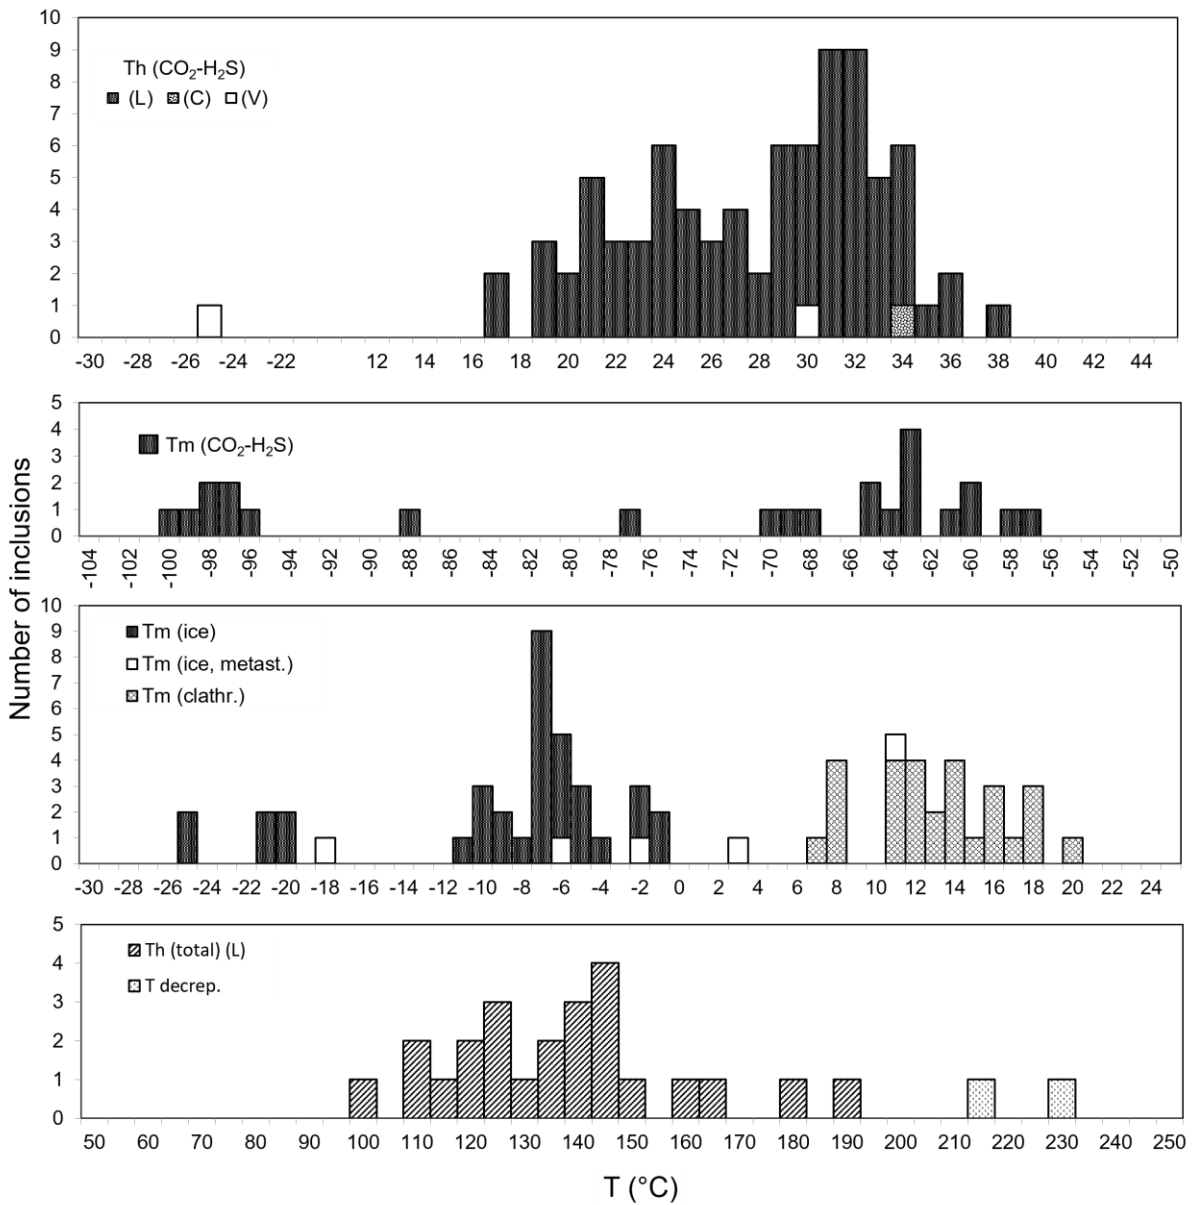

Supplementary Figure 1: Bar plots showing phase transition temperatures. From top to bottom: (i) homogenisation of the non-aqueous phase [Th (CO<sub>2</sub>-H<sub>2</sub>S)], (ii) melting of CO<sub>2</sub> and H<sub>2</sub>S [Tm (CO<sub>2</sub>-H<sub>2</sub>S)], (iii) ice and clathrate melting [Tm (ice)/Tm (ice, metast.) and Tm (clathr.), respectively], (iv) total homogenization and decrepitation [Th (total) and T deprec., respectively] temperatures. C, critical; V, vapour, L, liquid.

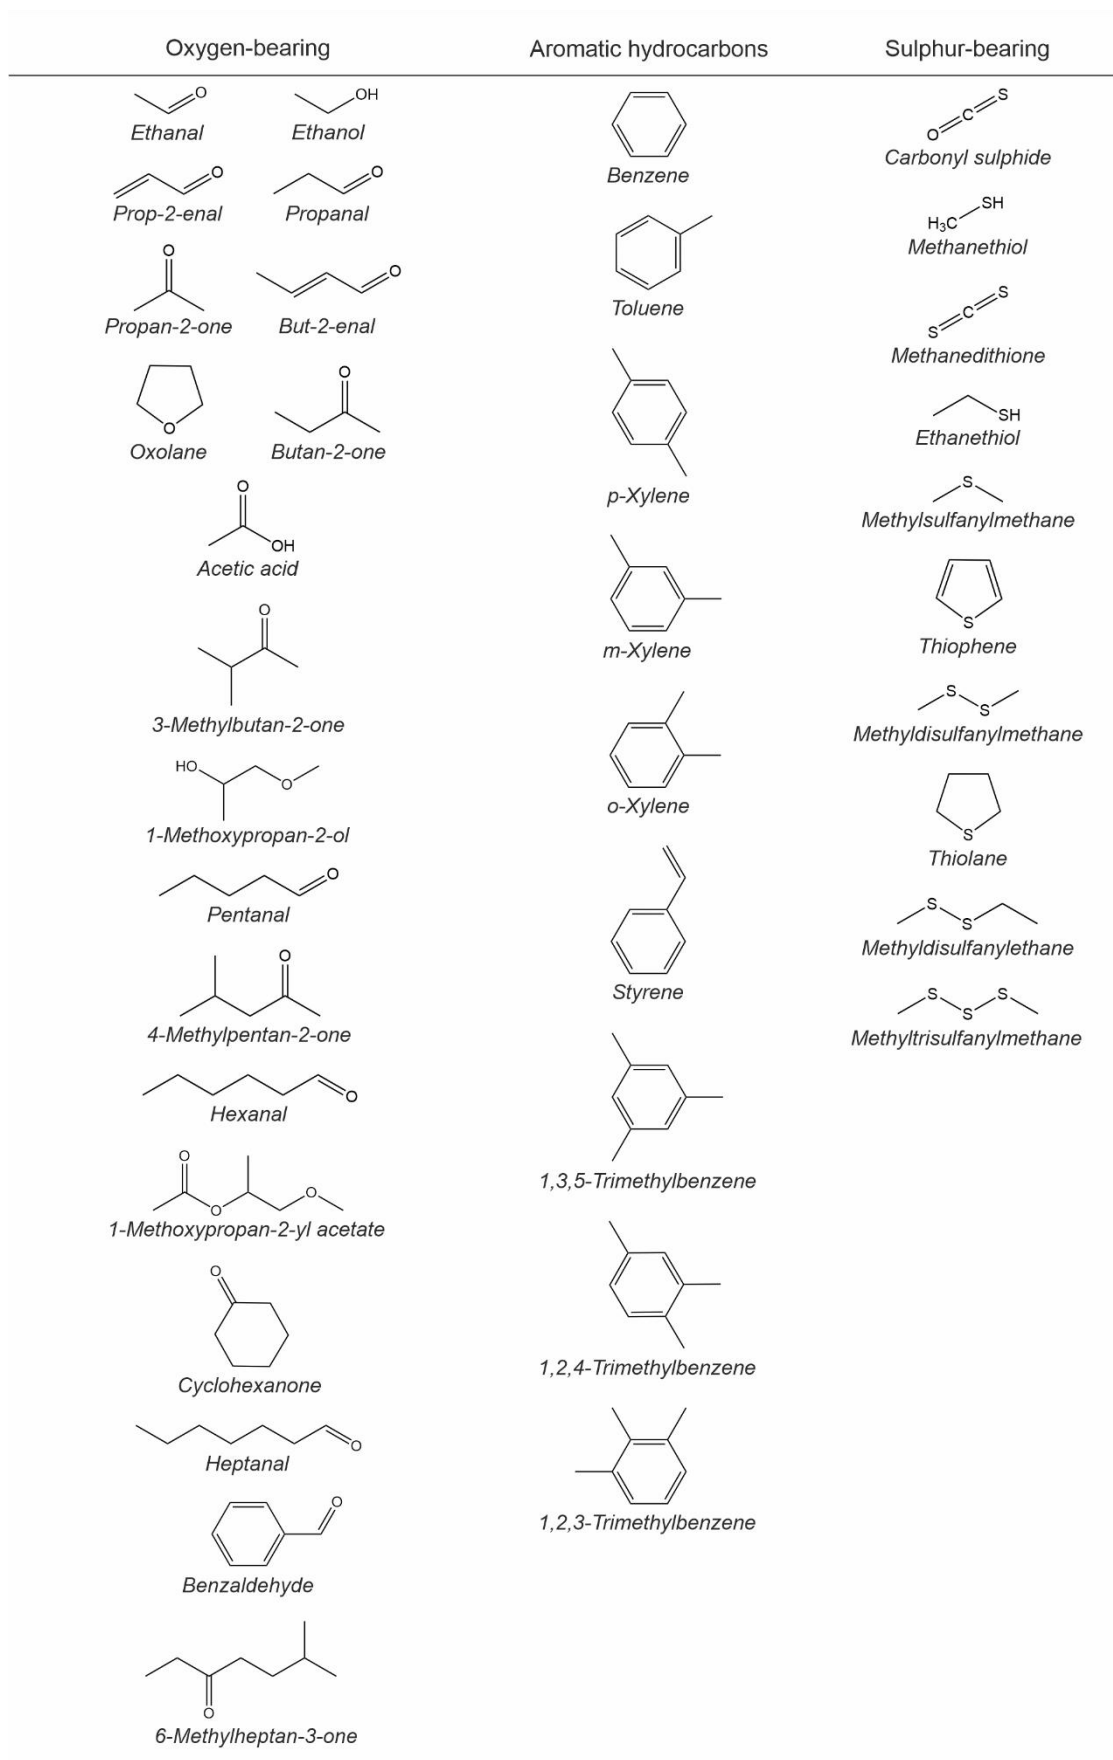

Supplementary Figure 2: Molecular structures of oxygen-bearing compounds, aromatic hydrocarbons, and sulphur-bearing compounds found in black barite fluid inclusions.

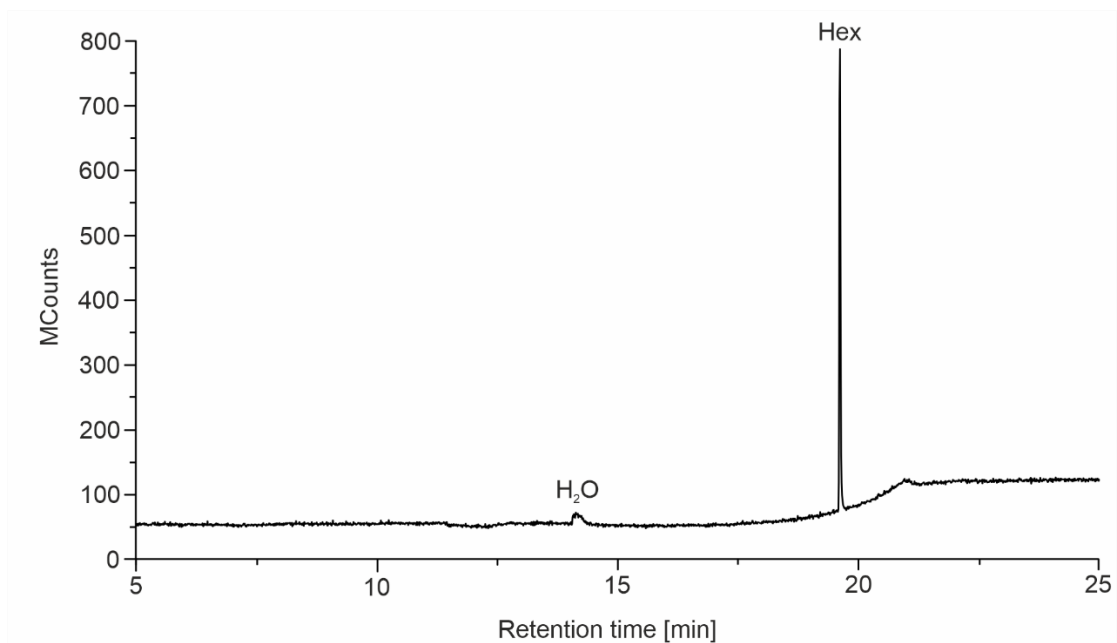

Supplementary Figure 3: Total ion current (TIC) chromatogram of thermal decrepitation/desorption GC-MS (TD-GC-MS) pre-analysis blank obtained at 250°C. Hex = *n*-hexane (retention time standard).

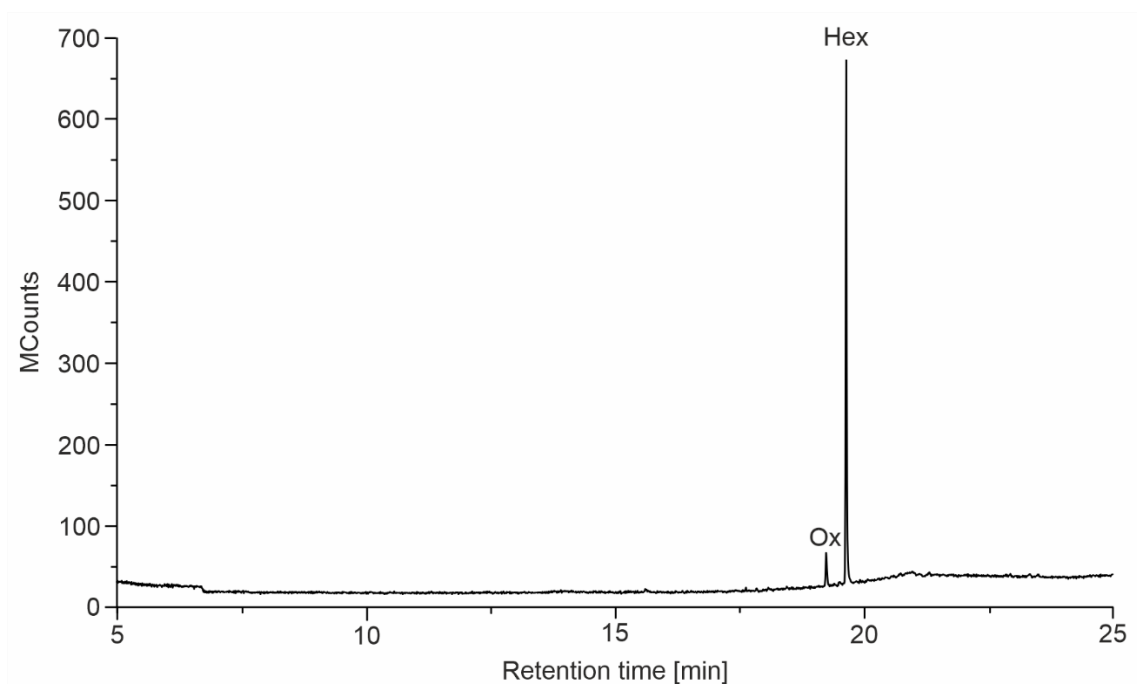

Supplementary Figure 4: Total ion current (TIC) chromatogram of solid phase micro extraction GC-MS (SPME-GC-MS) pre-analysis blank (uncrushed sample in grinding jar). Ox = oxolane; Hex = *n*-hexane (retention time standard).

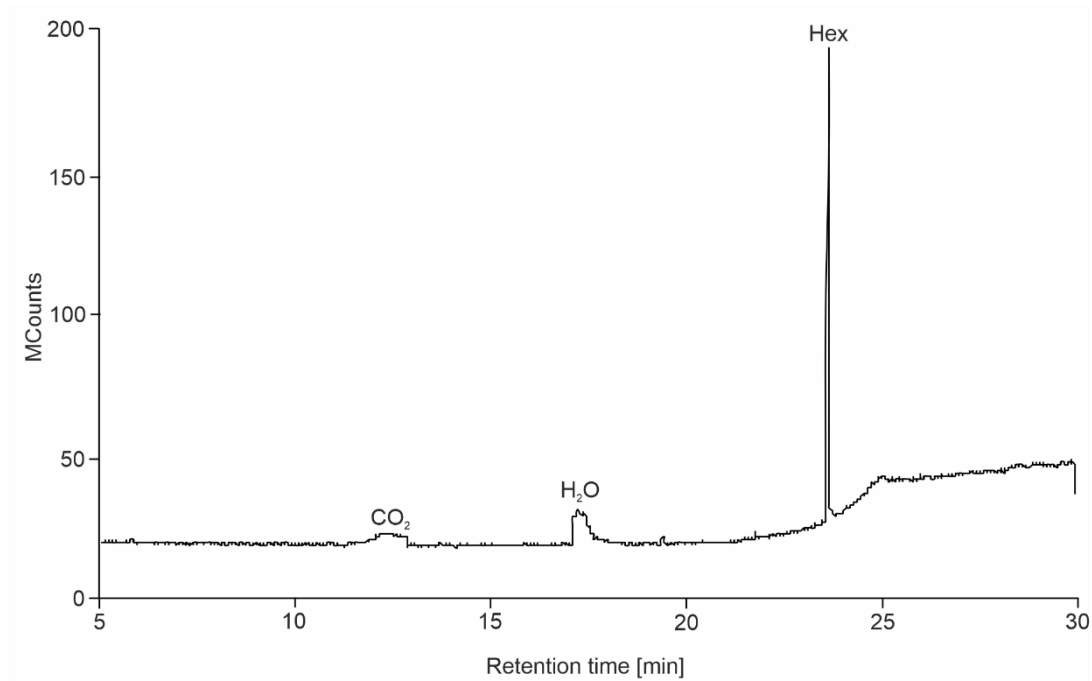

Supplementary Figure 5: Total ion current (TIC) chromatogram of volatile compounds released from white barite (very lean in fluid inclusions) by thermal decrepitation/desorption GC–MS (TD-GC–MS) obtained at 250°C. Note that only CO<sub>2</sub> and H<sub>2</sub>O were observed in minor abundances. This analysis serves as negative control. Hex = *n*-hexane (retention time standard).

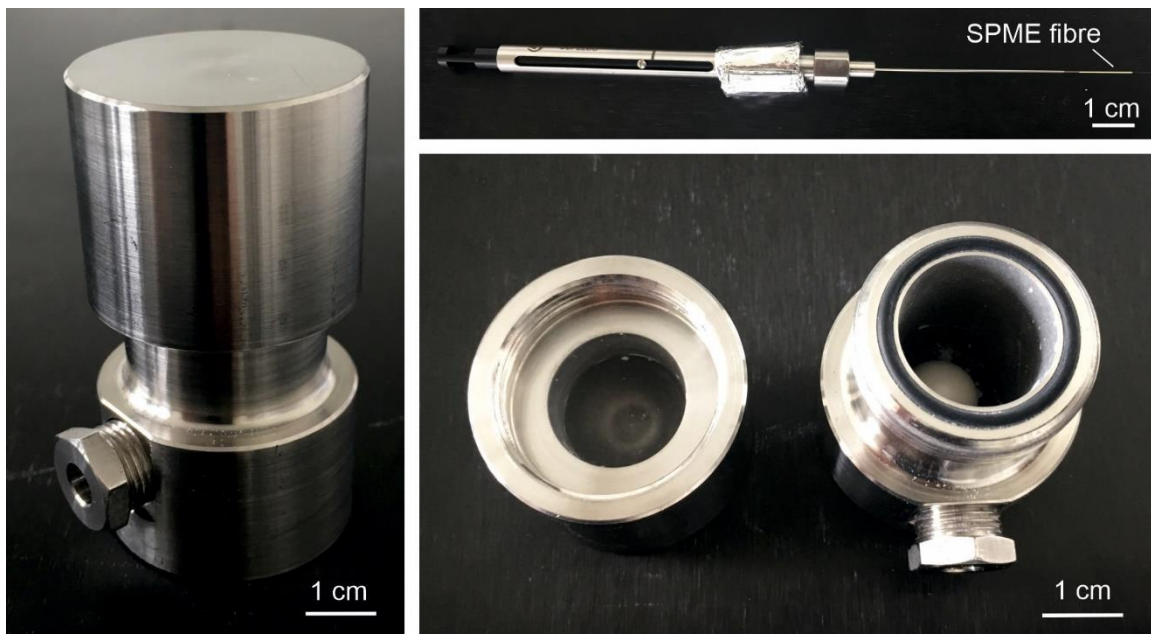

Supplementary Figure 6: Grinding jar equipped with a standard septum port and solid phase micro extraction (SPME) syringe with fibre exposed (upper right).
